# Supplementary material for: Estimating the influence of transport to aerosol size distributions during new particle formation events
Source: Copernicus journal article supplement (doi:10.5194/acp-2018-844), 2018-09-07
Supplement: Supplementary file 1 [file acp-2018-844-supplement.pdf]

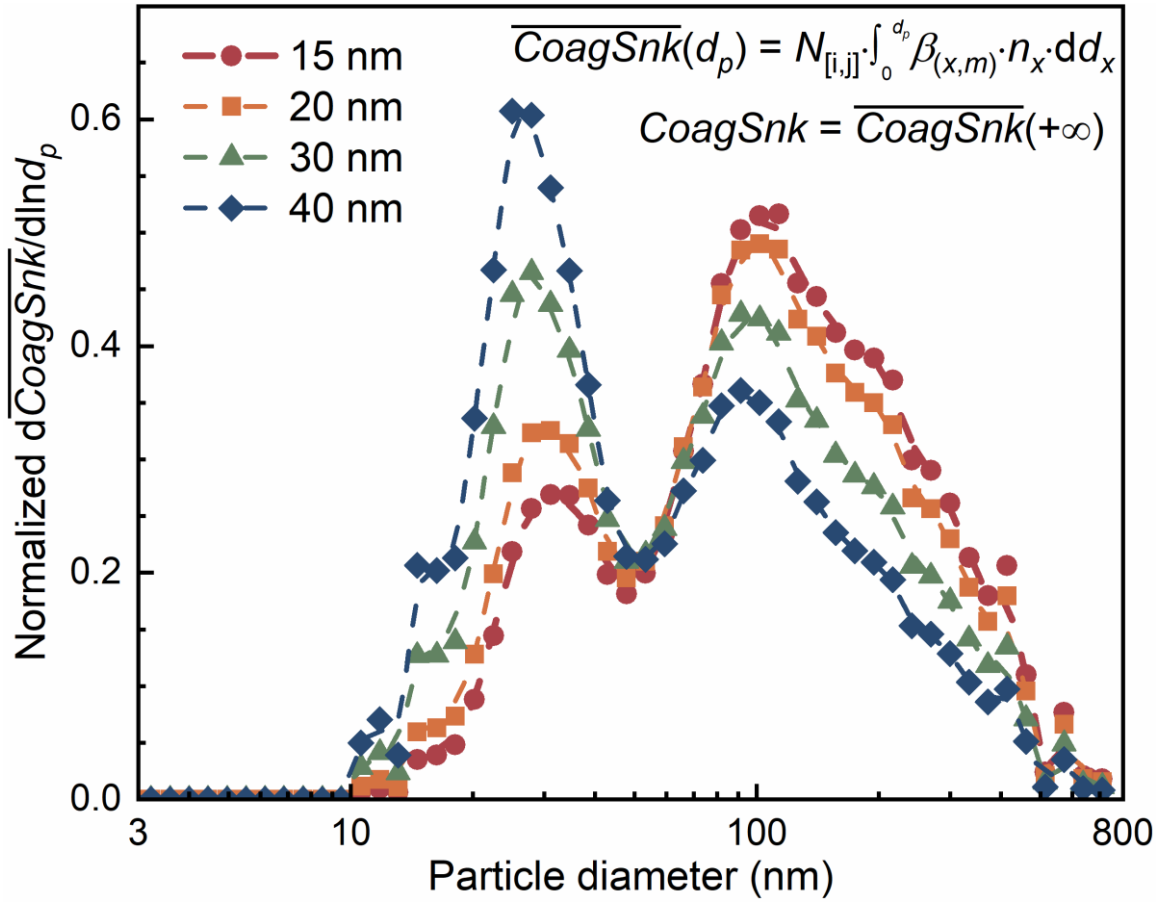

Figure S1: The distributions of the normalized cumulative  $CoagSnr$  at various particle sizes as the function of the particle diameter ( $d_p$ ) at 18:00 Mar. 16<sup>th</sup>, 2015, at the Fukue Island site. The vertical axis indicates the normalized contribution of each particle size bin to the  $CoagSnr$  and the contribution is normalized by dividing the  $CoagSnr$ . The subscripts i and j  $CoagS_{[i, j]}$  indicates the concerned particle size range from  $d_i$  to  $d_j$ .

NOAA HYSPLIT MODEL  
Backward trajectories ending at 0900 UTC 16 Mar 15  
GDAS Meteorological Data

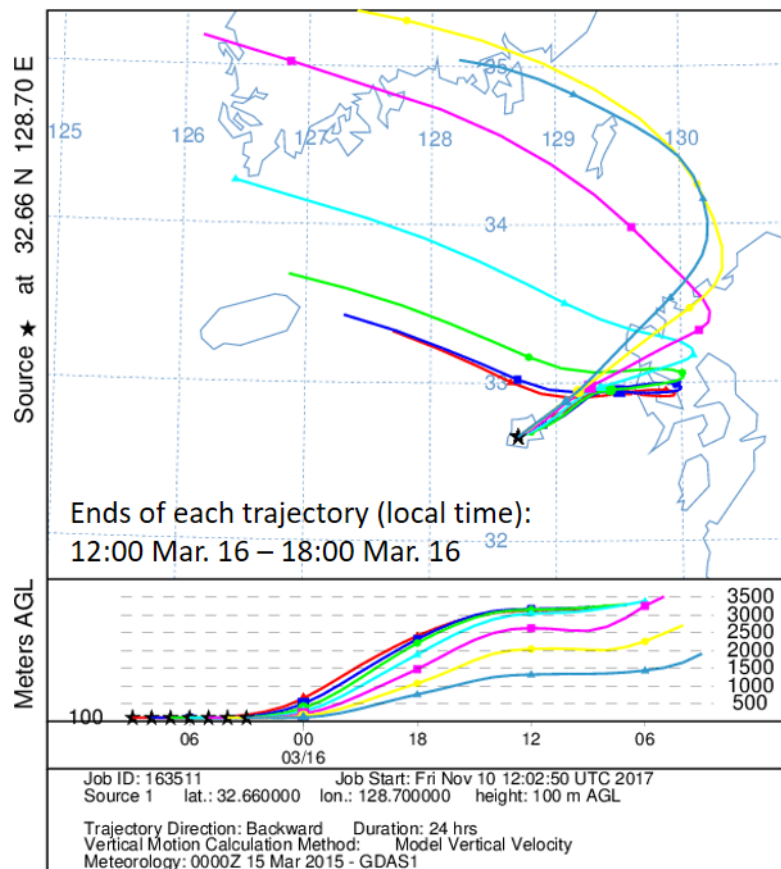

Figure S2: The backward trajectories of the air masses arriving at the Fukue Island on Mar. 16<sup>th</sup>, 2015.

NOAA HYSPLIT MODEL  
Backward trajectories ending at 0900 UTC 02 Mar 16  
GDAS Meteorological Data

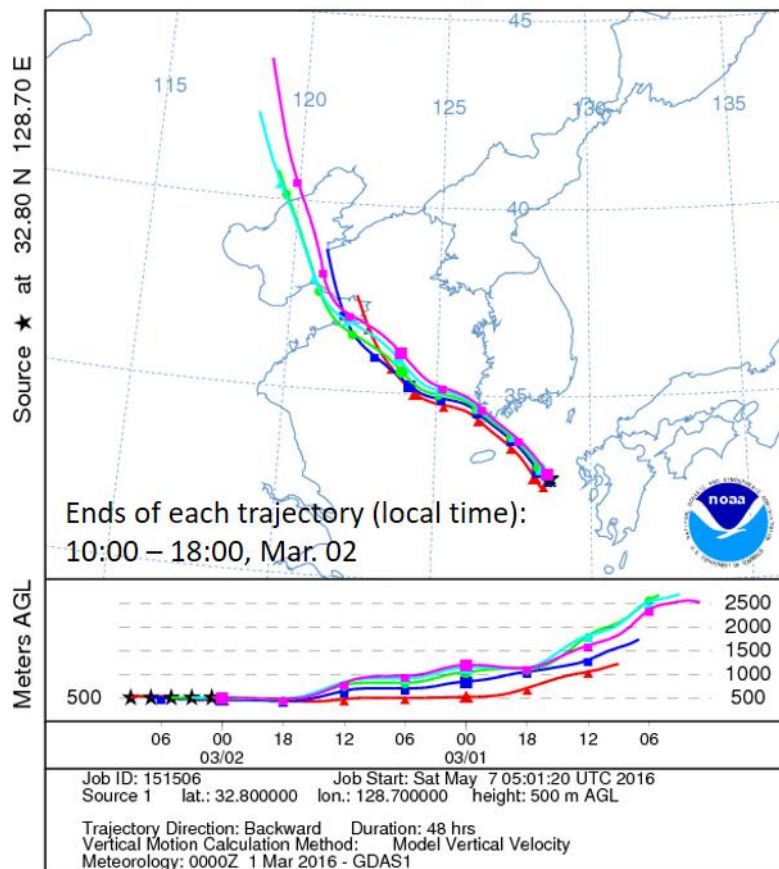

Figure S3: The backward trajectories of the air masses arriving at the Fukue Island on Mar. 2<sup>nd</sup>, 2016.

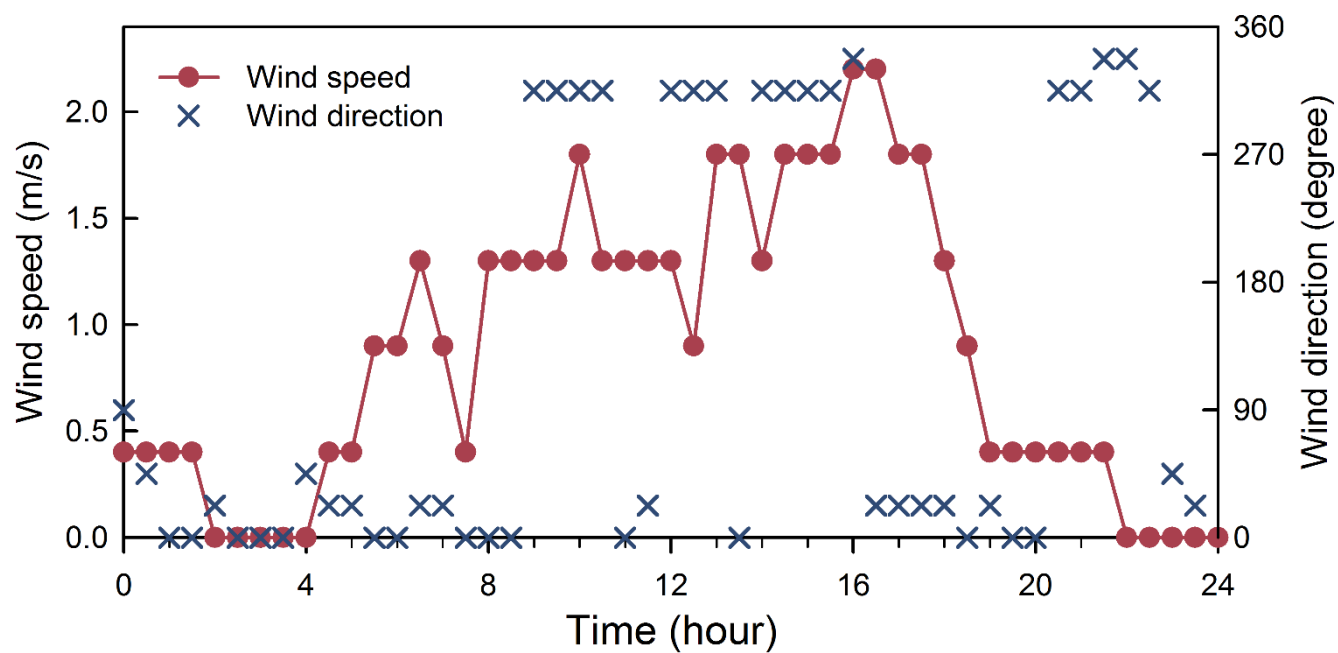

Figure S4: The wind speed and direction on Mar. 23<sup>rd</sup>, 2016, in urban Beijing.
